# Supplementary material for: Normal Glucagon Signaling and β-Cell Function After Near-Total α-Cell Ablation in Adult Mice
Source: PubMed Central journal article supplement — Diabetes. 2011 Oct 17;60(11):2872–82. doi: 10.2337/db11-0876 (PMC3198058; doi:10.2337/db11-0876), 2011-10-17

SUPPLEMENTARY DATA

**Supplementary Table 1. Sampling parameters for the morphometrical analyses**

| Time (post-DT) | Control mice (age-matched) |                                       |                |               | DT-treated mice |                                       |                |               |
|----------------|----------------------------|---------------------------------------|----------------|---------------|-----------------|---------------------------------------|----------------|---------------|
|                | mice                       | pancreatic surface (mm <sup>2</sup> ) | α-cells scored | islets scored | mice            | pancreatic surface (mm <sup>2</sup> ) | α-cells scored | islets scored |
| 1 week         | 3                          | 694.71                                | 4873           | 677           | 3               | 696.80                                | <b>98</b>      | 771           |
| 1 month        | 3                          | 634.58                                | 7711           | 731           | 3               | 709.58                                | <b>129</b>     | 775           |
| 6 months       | 4                          | 1026.30                               | 10024          | 1424          | 4               | 1154.38                               | <b>401</b>     | 1553          |

**Supplementary Table 2. Pancreatic and Plasma Glucagon (2-month-old male mice; 1 week post-DT)**

|                                                                                                    | Control |        |    | DT-treated  |                  |    | % of control | fold change |
|----------------------------------------------------------------------------------------------------|---------|--------|----|-------------|------------------|----|--------------|-------------|
|                                                                                                    | mean    | sem    | n  | mean        | sem              | n  |              |             |
| <b>Total pancreatic glucagon content (ng)</b>                                                      | 746.6   | ± 45.5 | 10 | <b>7.3</b>  | <b>***</b> ± 0.5 | 6  | 0.98         | -101.7      |
| <b>Body weight (g)</b>                                                                             | 28.6    | ± 1.0  | 3  | 26.8        | <b>ns</b> ± 0.7  | 4  | 93.68        | -1.1        |
| <b>Observed plasma glucagon (pg/ml)</b>                                                            | 59.3    | ± 4.5  | 14 | <b>38.7</b> | <b>***</b> ± 1.2 | 10 | 65.24        | -1.5        |
|                                                                                                    |         |        |    |             |                  |    |              |             |
|                                                                                                    |         |        |    |             |                  |    |              |             |
| <b>Estimated total plasma volume (3.7% of body weight §)</b>                                       | 1.1     | ml     |    | 1.0         | ml               |    |              |             |
| <b>Estimated plasma glucagon (pg/ml) if all pancreatic glucagon were released into circulation</b> | 704709  |        |    | 7395        |                  |    |              |             |

SUPPLEMENTARY DATA

**Supplementary Figure 1. DT-mediated cell ablation is specific to pancreatic  $\alpha$ -cells in *Glucagon-DTR* mice.** Pancreatic somatostatin-expressing  $\delta$ -cells, insulin-expressing  $\beta$ -cells and pancreatic polypeptide (PP)-producing PP-cells are still present after DT administration. Only glucagon-expressing  $\alpha$ -cells are eliminated. Scale bars: 20  $\mu$ m.

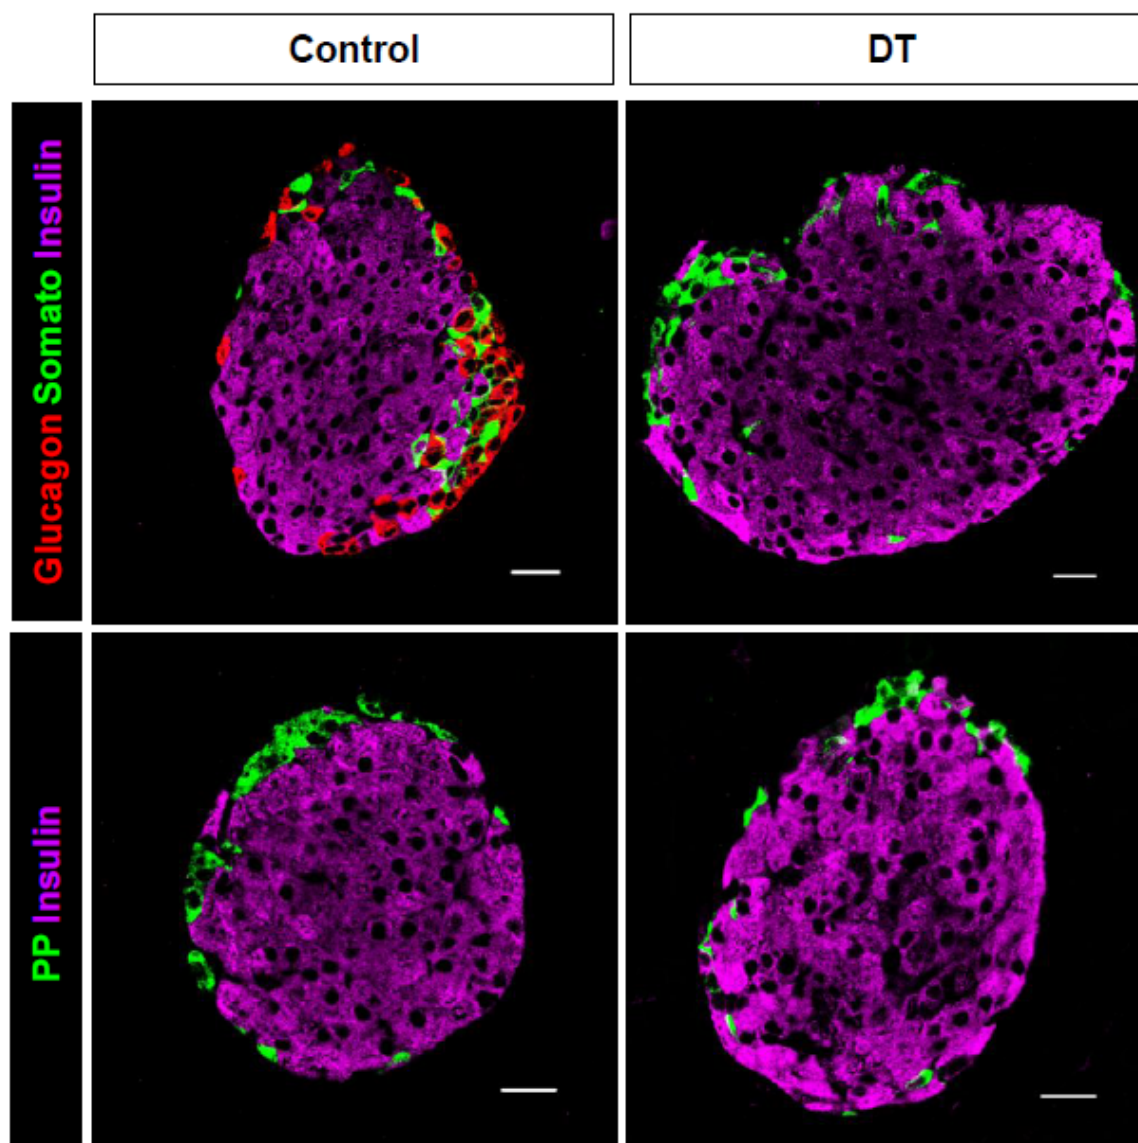

SUPPLEMENTARY DATA

**Supplementary Figure 2. Glucagon protein is not produced by intestinal cells after  $\alpha$ -cell ablation in *Glucagon-DTR* mice.** **A**, Intestinal GLP1-expressing L-cells (white arrowheads) are still observed after DT. Note that polyclonal GLP1 antibody labels pancreatic  $\alpha$ -cells (yellow staining in an islet, right column), whereas monoclonal Glucagon antibody does not label intestinal GLP1-producing L-cells, thus indicating that glucagon protein is not produced by intestinal cells, even after DT. Scale bars: 20  $\mu$ m. **B**, Glucagon content in pancreas and intestine, before and after massive  $\alpha$ -cell ablation. Pancreatic glucagon levels after DT are just above the limit of detection in *Glucagon-DTR* mice, whereas intestinal glucagon is always at background level, and is not increased after DT. **C**, Plasma active GLP-1 and GIP levels were not significantly changed after DT (control:  $147.7 \pm 28.4$  pg/ml, n=3, and DT:  $180.9 \pm 11.1$  pg/ml, n=3 for active GLP-1; control:  $125.4 \pm 24.7$  pg/ml, n=10, and DT:  $119.2 \pm 15.8$  pg/ml, n=7 for GIP).

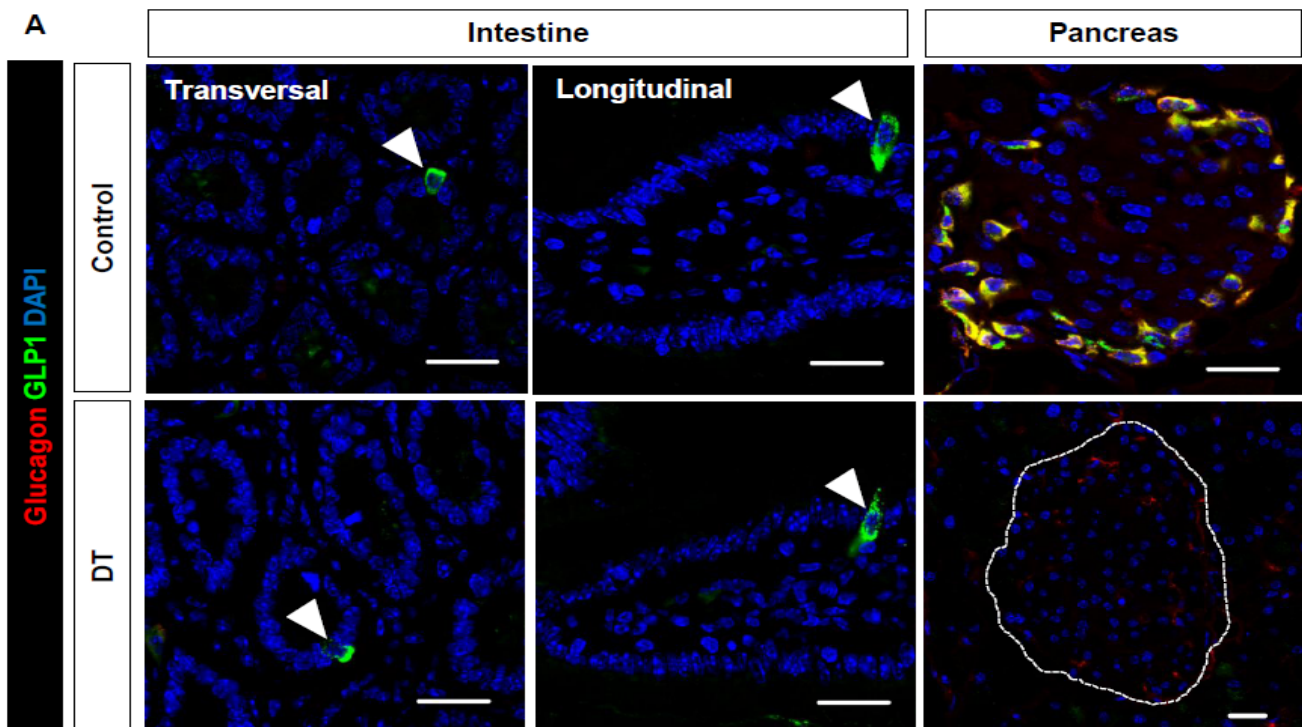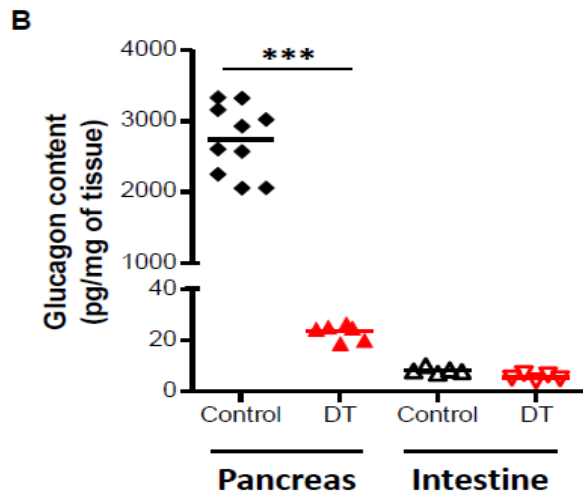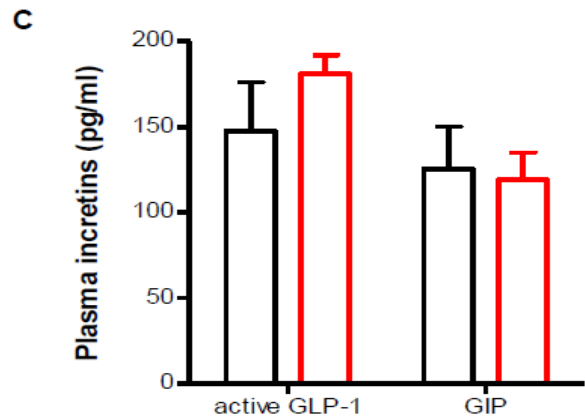

SUPPLEMENTARY DATA

**Supplementary Figure 3. Additional Metabolic parameters. A-B**, Evolution of body weight (A) and glycemia (B) in random-fed controls (n=3; DT-untreated, black diamonds) and DT-treated (n=3; red triangles) *Glucagon-DTR* mice. No significant change was observed during the period of analysis (up to 6 months after DT). **C**, Glycemia in controls and DT-treated *Glucagon-DTR* mice after a prolonged starvation of 27 hours. No significant difference was observed. **D**, qPCR showing the regulation (fold variation) of G6Pase, PEPCK, GcgR and GP genes at 1 week and 6 months post DT-induced alpha-cell ablation. (black – control non-injected; red – DT-treated; n=3 / group: 1 week after DT and n=8 / group: 6 months after DT). **E-F**, Pyruvate tolerance tests performed 1 week (E) or 6 months (F) after DT in DT-treated mice (n=7 at 1 week and n=4 at 6 months) or controls (n=6 at 1 week and n=4 at 6 months). No significant changes were observed. **G**, Glucagon tolerance test performed 1 week after DT in DT-treated mice (red) or controls (black). The grey area shows the phase of glucose mobilization mediated by exogenous glucagon. **H**, Area under the curve (AUC) of the glucose mobilization phase after glucagon challenge (grey phase in G; 215.6±19.8, n=2 for controls and 279.5±13.8, n=4 for DT-treated mice; \*p=0.02).

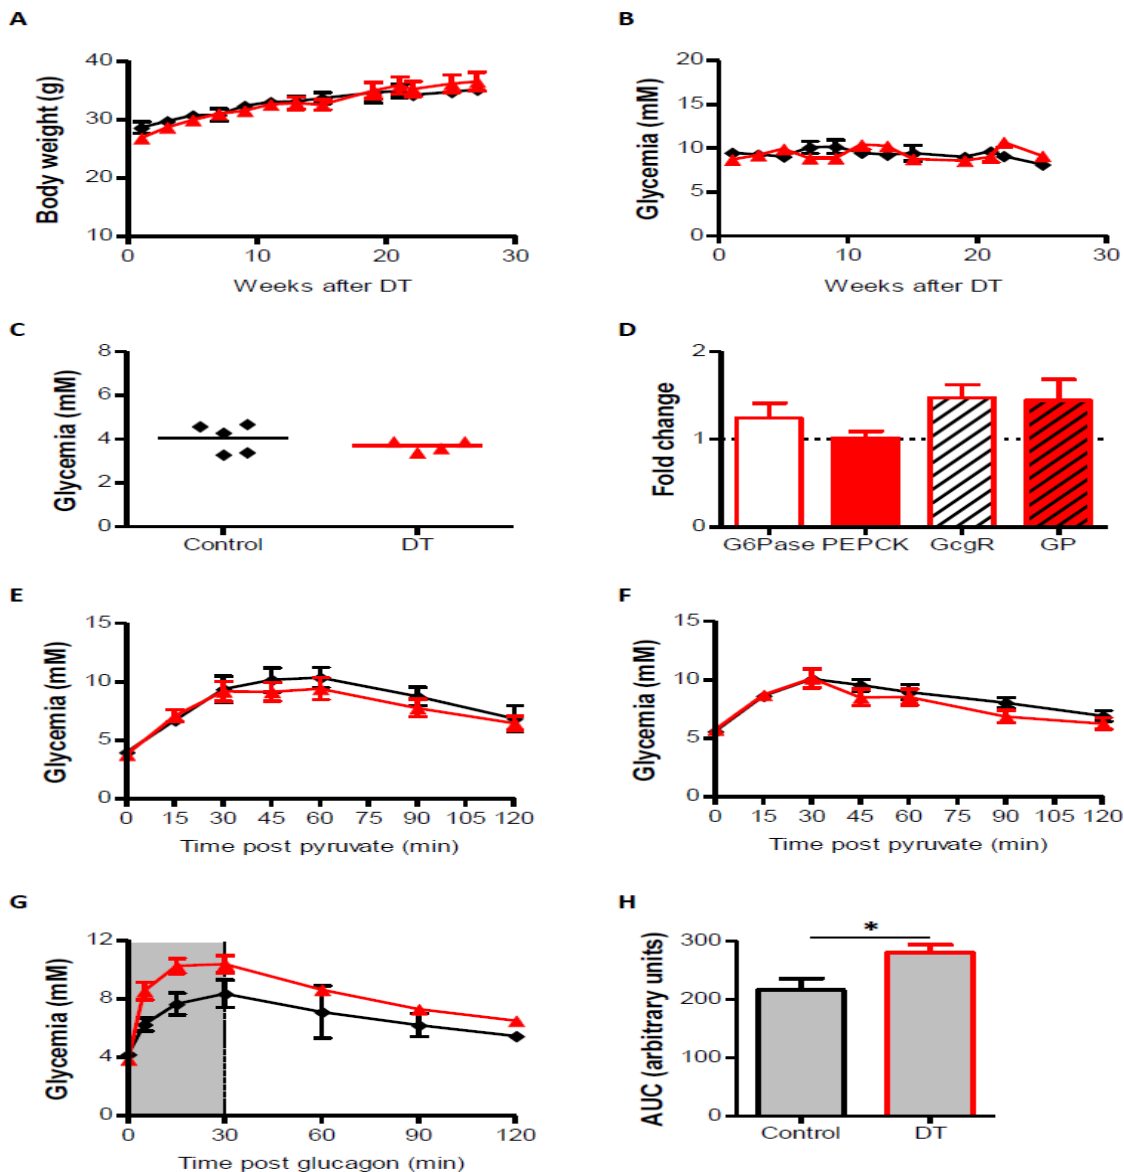

SUPPLEMENTARY DATA

**Supplementary Figure 4. DT-treated *Glucagon-DTR* mice are not glucose intolerant 6 months after massive  $\alpha$ -cell ablation.** Controls: black diamonds, DT-treated *Glucagon-DTR* mice: red triangles (n=4 mice per group).

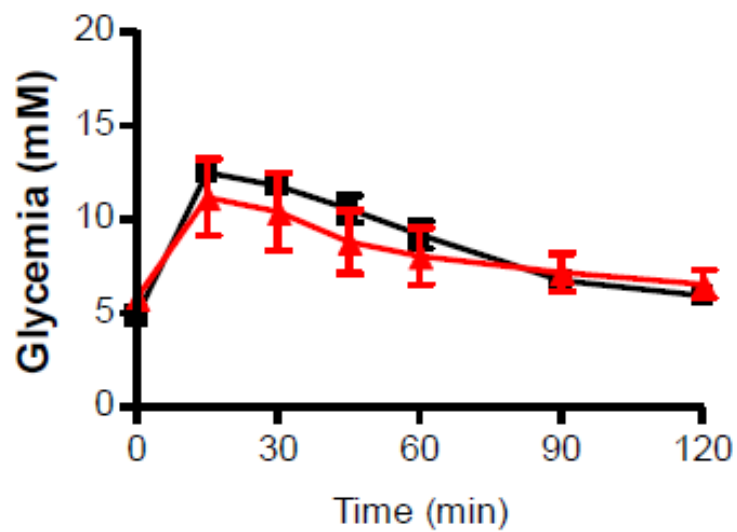

SUPPLEMENTARY DATA

**Supplementary Figure 5. Lack of increased  $\alpha$ -cell apoptosis after DT in *Glucagon-DTR* mice.** **A**, No  $\alpha$ -cell death is observed by TUNEL assay in 2 month-old untreated *Glucagon-DTR* mice (controls). **B**, 1 day after DT, many TUNEL+ cells are observed at islet periphery, indicative of massive  $\alpha$ -cell death. **B' and B''**: Higher magnification of the square area depicted in **B**. The arrowhead shows a dying cell exhibiting a typical condensed and fragmented pyknotic nucleus. **C-D**, No  $\alpha$ -cell death is observed in young adult (2 month-old) or in aged (8 month-old) DT-untreated *Glucagon-DTR* mice (**D**: consecutive pancreatic section of **C**). **C' and D'**: Higher magnification of the area depicted in **C** and **D**, respectively. Numerous  $\alpha$ -cells are present (**C'**) at islet periphery, yet no TUNEL+ cell (**D'**) is observed. **E-F**, The very few remaining  $\alpha$ -cells after DT are TUNEL- (1 month after DT is shown here). Similar results were observed 1 week or 6 months post DT; **F**: consecutive pancreatic section of **E**). **E' and F'**: Higher magnification of the area depicted in **C** and **D**, respectively. Note that the two  $\alpha$ -cells in **E'** are TUNEL- (**F'**) while many TUNEL+ are observed in the adjacent lymph node (LN; internal positive control). Scale bars: **A-B** and **C-F**: 75  $\mu$ m; **B' and B''**: 5  $\mu$ m.

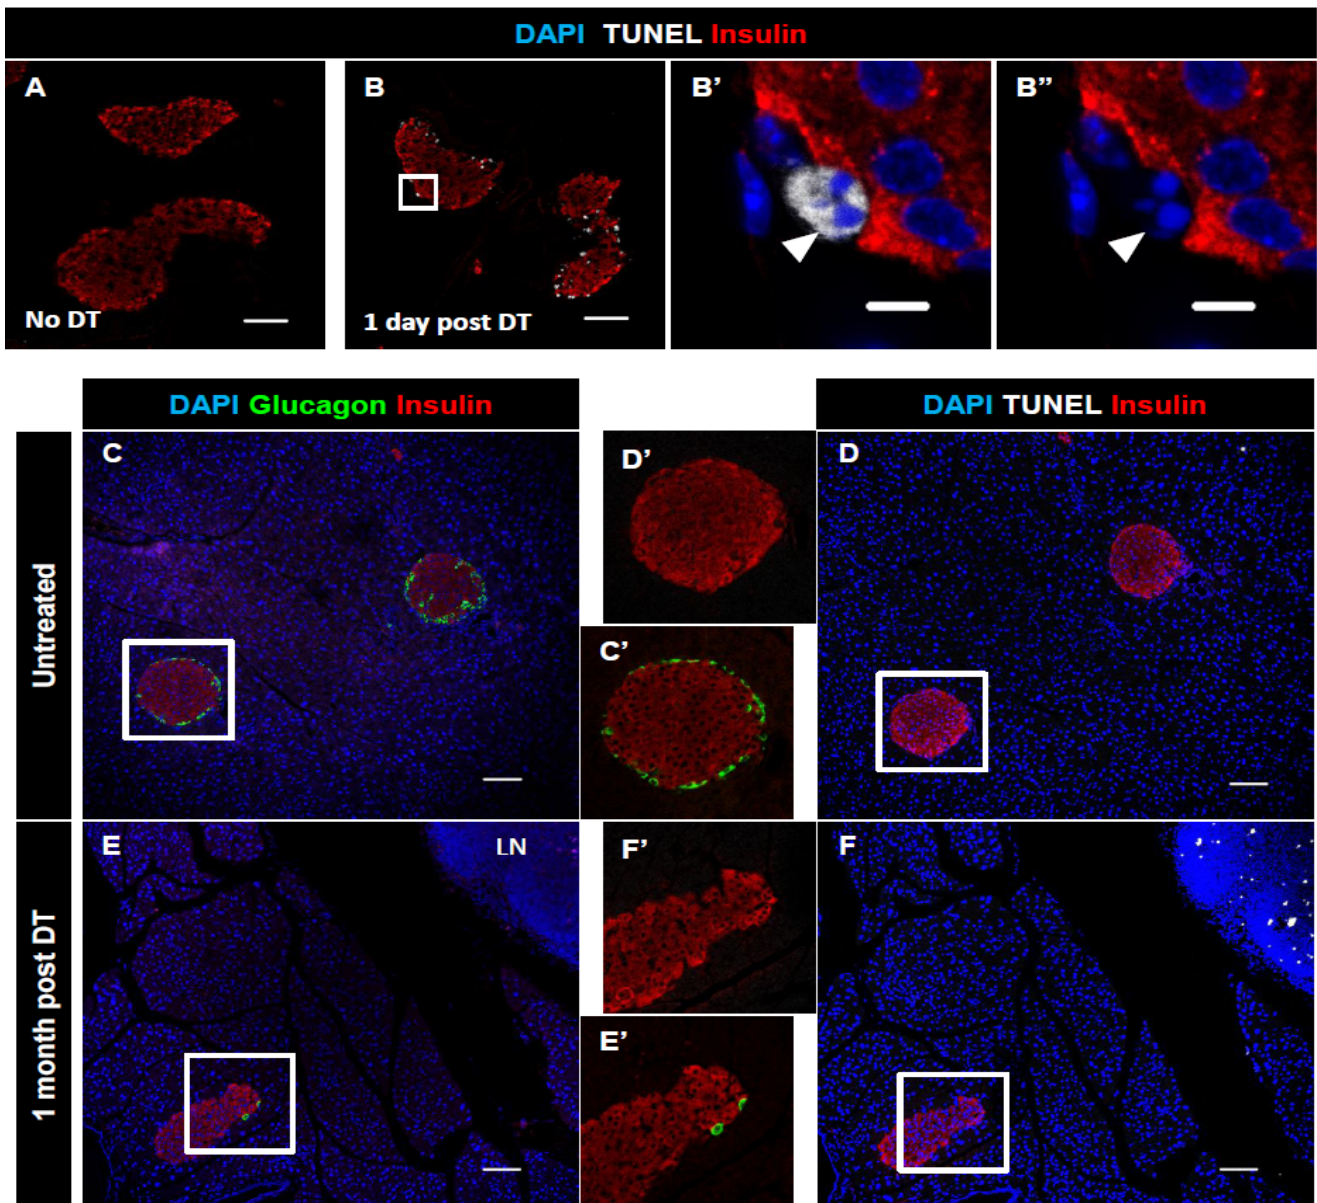

SUPPLEMENTARY DATA

**Supplementary Figure 6. Lack of increased  $\alpha$ -cell proliferation after DT administration in *Glucagon-DTR* mice.** A-B, The mitotic marker phosphohistone H3 (PHH3) stains highly proliferative intestinal cells located in crypts (internal positive control). C and D,  $\alpha$ -cells are not actively proliferating in untreated controls or after DT in *Glucagon-DTR* mice (in C, 246 islets were scored, with a total of 4222 glucagon+ cells counted at different ages: only 6 PHH3+ / glucagon+ cells were observed, i.e. 0.14%; in D, 1640 islets were scored after 1 week, 1 month and 6 months post DT; among the 522  $\alpha$ -cells observed, only one was PHH3+, i.e. 0.18%). Arrowheads in C and D indicate non-islet proliferative cells. P: adjacent pancreas tissue. Scale bars: A: 75  $\mu$ m; B: 25  $\mu$ m; C-D: 20  $\mu$ m.

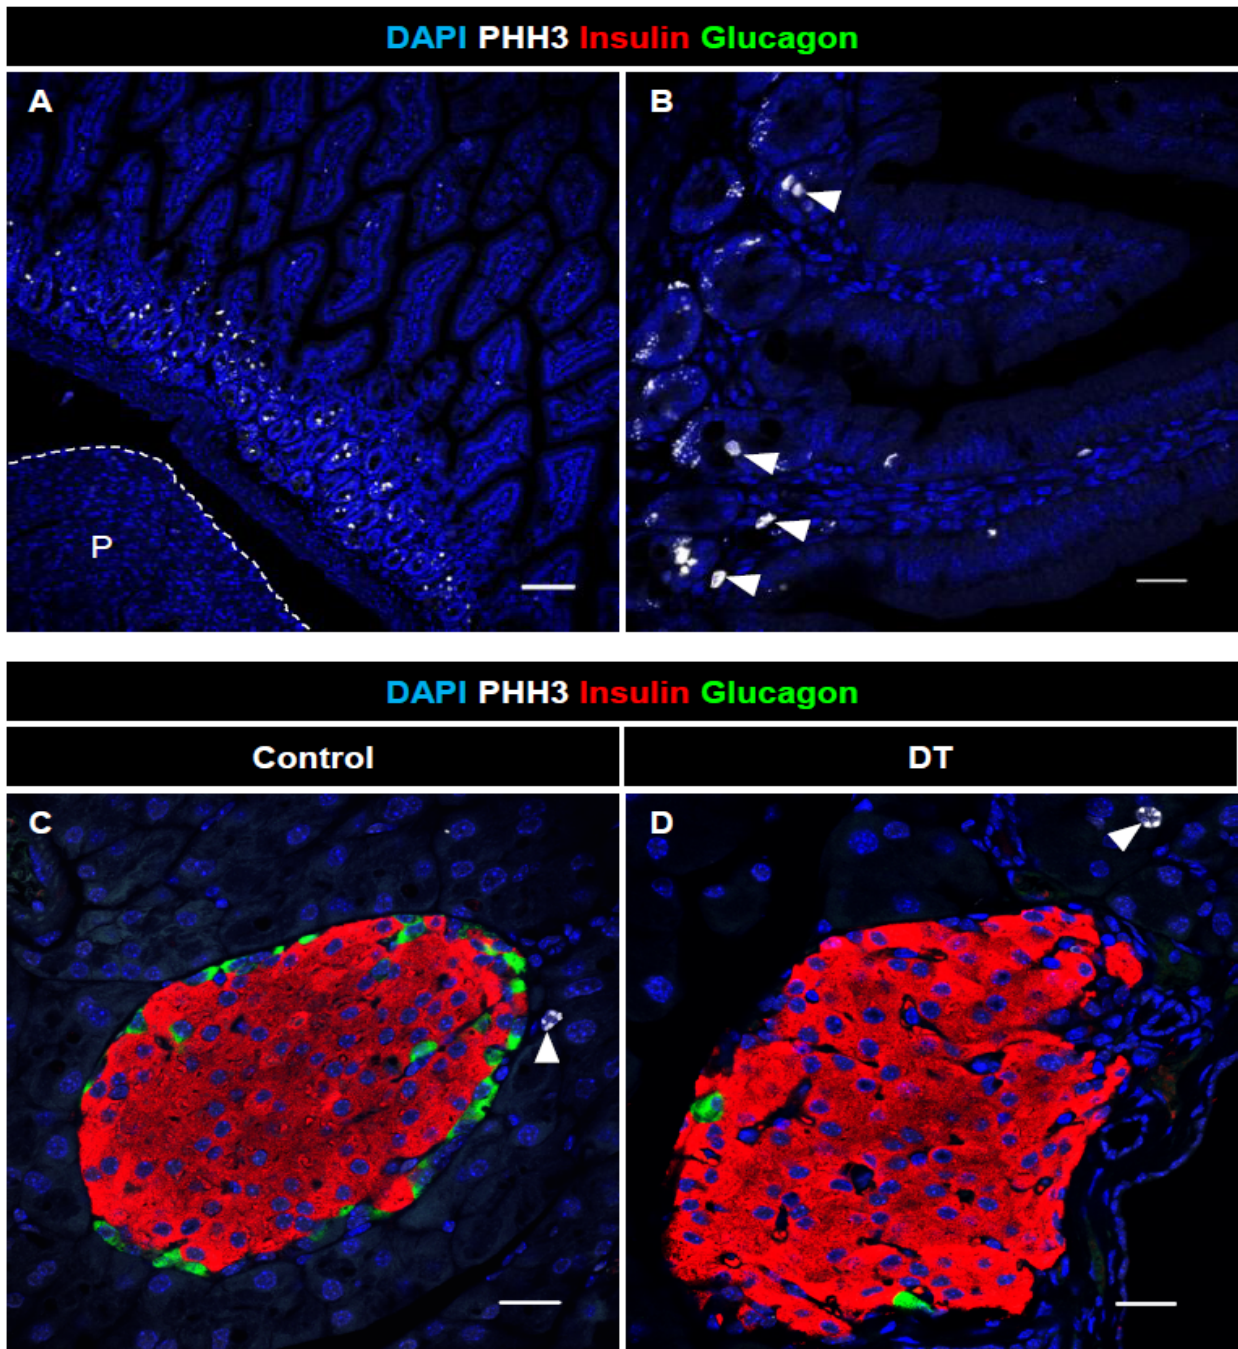

SUPPLEMENTARY DATA

**Supplementary Figure 7. Simultaneous  $\alpha$ - and  $\beta$ -cell ablation does not prevent DT-induced diabetes.** **A**, Double transgenic mice used. **B**, Experimental design. Transgenic mice were treated with DT and were euthanized 5 days later. Note that DT administration removes >99% of  $\beta$ -cells in *RIP-DTR* mice and animals cannot survive if no exogenous insulin is administered as early as 5 days post-DT. **C-E**, Confocal images of pancreatic sections showing simultaneous DT-mediated  $\alpha$ - and  $\beta$ -cell ablation. Arrowhead shows one remaining  $\alpha$ -cell after DT. Control represents DT-untreated bitransgenic animals. Scale bars: 20  $\mu$ m. **F**, Follow up of glycemia. DT-treated doubly transgenics become hyperglycemic after simultaneous  $\alpha$ - and  $\beta$ -ablation. By contrast, DT-untreated bitransgenics remain normoglycemic (red triangles: DT-treated double transgenic mice, n=4; black squares: untreated bitransgenic mice, n=4). **G**, Body weights 5 days after DT. Mice treated with DT develop diabetes and become cachectic.

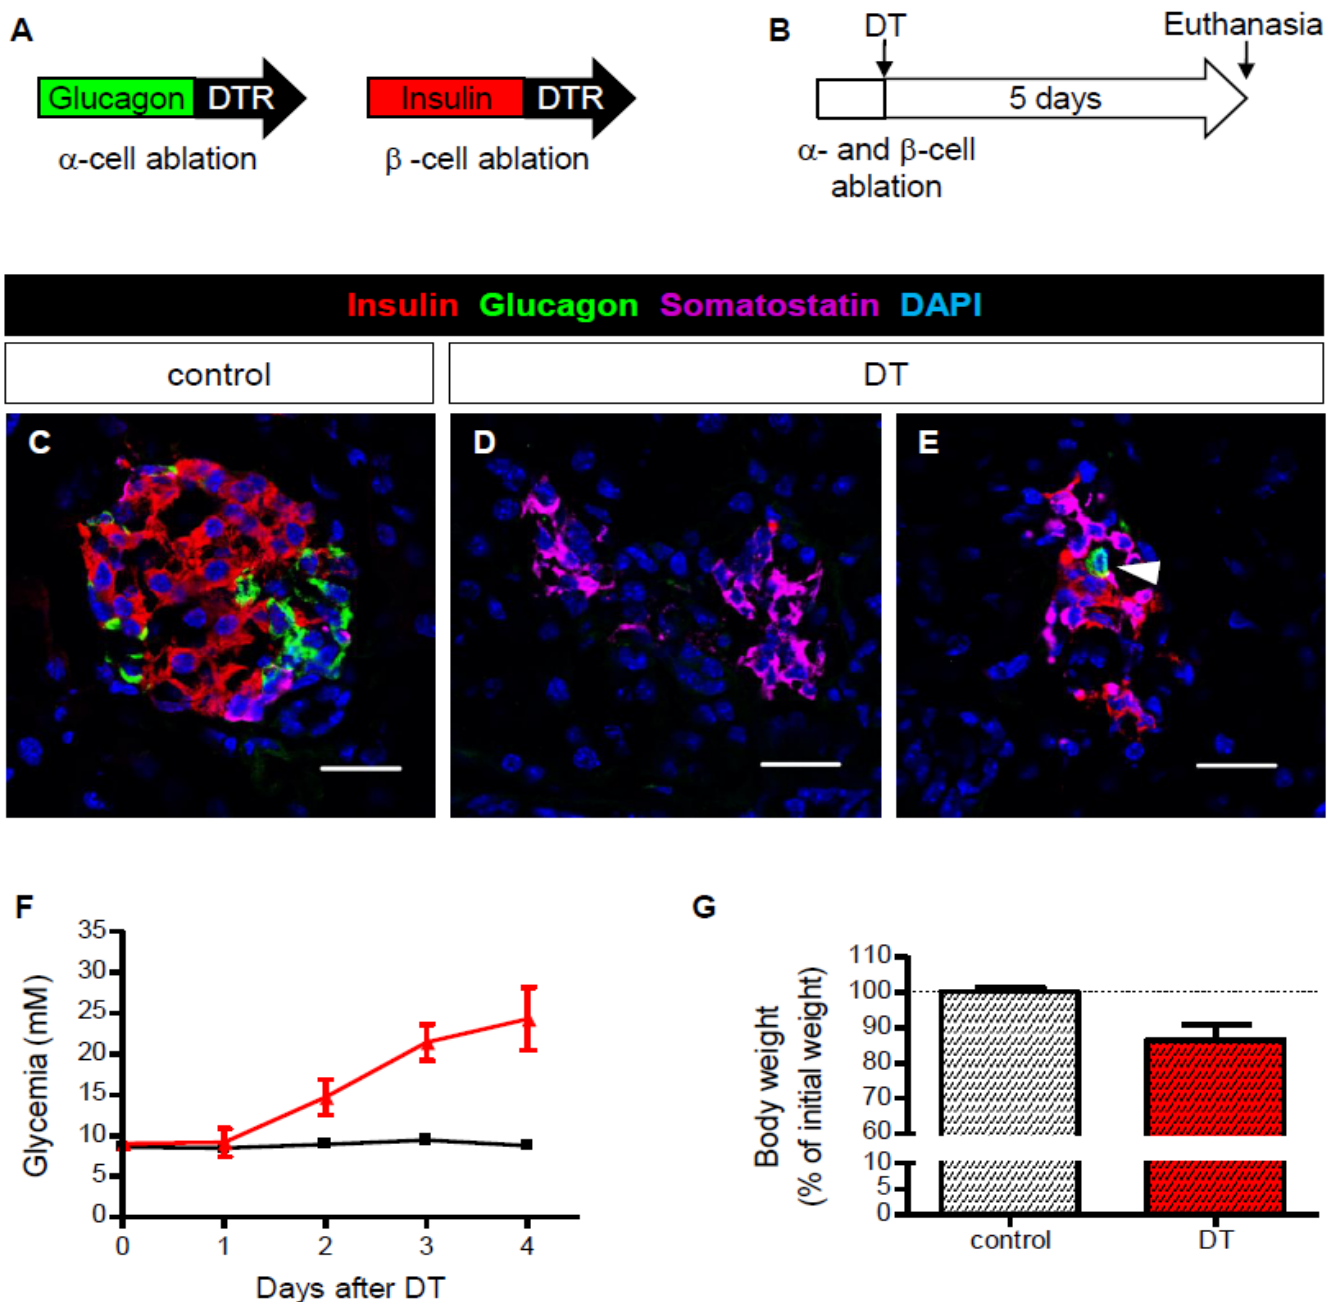

Supplement: supp_db11-0876_DB110876SupplementaryData.pdf [file supp_db11-0876_DB110876SupplementaryData.pdf]
